# Supplementary material
Source: PubMed Central journal article supplement (PMC3999289)
Supplement: NIHMS550221-supplement-1.pdf [file NIHMS550221-supplement-1.pdf]

**Supplementary table 1. Histopathological analysis of disease grade in cervical (A) and vaginal (B) tissues from mice treated with estrogen for 6 months.**

**A.**

| <i>Genotype</i>                      | Group size, n | Severity of disease, n (%) |           |           |           |          |
|--------------------------------------|---------------|----------------------------|-----------|-----------|-----------|----------|
|                                      |               | Hyperplasia                | CIN1      | CIN2      | CIN3      | C.Cancer |
| <i>NTG/FancD2</i> <sup>+/+</sup>     | 15            | 14 (93.3)                  | 1 (6.7)   | -         | -         | -        |
| <i>NTG/FancD2</i> <sup>-/-</sup>     | 16            | 11 (68.8)                  | 5 (31.3)  | -         | -         | -        |
| <i>K14E6/FancD2</i> <sup>+/+</sup>   | 19            | 5 (26.3)                   | 14 (73.7) | -         | -         | -        |
| <i>K14E6/FancD2</i> <sup>-/-</sup>   | 22            | 5 (22.7)                   | 11 (50.0) | 4 (18.2)  | 1 (4.5)   | 1 (4.5)  |
| <i>K14E7/FancD2</i> <sup>+/+</sup>   | 27            | -                          | 1 (3.7)   | 9 (33.3)  | 13 (48.1) | 4 (14.8) |
| <i>K14E7/FancD2</i> <sup>-/-</sup>   | 28            | -                          | -         | 6 (21.4)  | 13 (46.4) | 9 (32.1) |
| <i>K14E6E7/FancD2</i> <sup>+/+</sup> | 21            | -                          | -         | 10 (47.6) | 7 (33.3)  | 4 (19.0) |
| <i>K14E6E7/FancD2</i> <sup>-/-</sup> | 21            | -                          | -         | 3 (14.3)  | 10 (47.6) | 8 (38.1) |

**Statistical analysis of difference in disease grade of each mice. All statistical analyses were performed by two-sided Wilcoxon rank sum test.**

*NTG/FancD2*<sup>+/+</sup> vs. *NTG/FancD2*<sup>-/-</sup>; P=0.044

*K14E6/FancD2*<sup>+/+</sup> vs. *K14E6/FancD2*<sup>-/-</sup>; P=0.068

*K14E7/FancD2*<sup>+/+</sup> vs. *K14E7/FancD2*<sup>-/-</sup>; P=0.043

*K14E6E7/FancD2*<sup>+/+</sup> vs. *K14E6E7/FancD2*<sup>-/-</sup>; P=0.014

**B.**

| <i>Genotype</i>                      | <b>Group size, n</b> | <b>Severity of disease, n (%)</b> |              |              |              |                 |
|--------------------------------------|----------------------|-----------------------------------|--------------|--------------|--------------|-----------------|
|                                      |                      | <b>Hyperplasia</b>                | <b>VAIN1</b> | <b>VAIN2</b> | <b>VAIN3</b> | <b>V.Cancer</b> |
| <i>NTG/FancD2</i> <sup>+/+</sup>     | 15                   | 15 (100)                          | -            | -            | -            | -               |
| <i>NTG/FancD2</i> <sup>-/-</sup>     | 16                   | 12 (75.0)                         | 4 (25.0)     | -            | -            | -               |
| <i>K14E6/FancD2</i> <sup>+/+</sup>   | 19                   | 13 (68.4)                         | 5 (26.3)     | -            | -            | 1 (5.3)         |
| <i>K14E6/FancD2</i> <sup>-/-</sup>   | 22                   | 13 (59.1)                         | 7 (31.8)     | 1 (4.5)      | -            | 1 (4.5)         |
| <i>K14E7/FancD2</i> <sup>+/+</sup>   | 27                   | 1 (3.7)                           | 11 (40.7)    | 11 (40.7)    | 2 (7.4)      | 2 (7.4)         |
| <i>K14E7/FancD2</i> <sup>-/-</sup>   | 28                   | -                                 | 3 (10.7)     | 11 (39.3)    | 7 (25.0)     | 7 (25.0)        |
| <i>K14E6E7/FancD2</i> <sup>+/+</sup> | 21                   | -                                 | -            | 13 (61.9)    | 5 (23.8)     | 3 (14.3)        |
| <i>K14E6E7/FancD2</i> <sup>-/-</sup> | 21                   | -                                 | -            | 9 (42.9)     | 5 (23.8)     | 7 (33.3)        |

Statistical analysis of difference in disease grade of each mice. All statistical analyses were performed by two-sided Wilcoxon rank sum test.

*NTG/FancD2*<sup>+/+</sup> vs. *NTG/FancD2*<sup>-/-</sup>; P=0.020

*K14E6/FancD2*<sup>+/+</sup> vs. *K14E6/FancD2*<sup>-/-</sup>; P=0.263

*K14E7/FancD2*<sup>+/+</sup> vs. *K14E7/FancD2*<sup>-/-</sup>; P=0.0005

*K14E6E7/FancD2*<sup>+/+</sup> vs. *K14E6E7/FancD2*<sup>-/-</sup>; P=0.075
