# Supplementary material
Source: PubMed Central journal article supplement (PMC3999289)
Supplement: NIHMS550221-supplement-2.pdf [file NIHMS550221-supplement-2.pdf]

# Supplementary Figure 1.

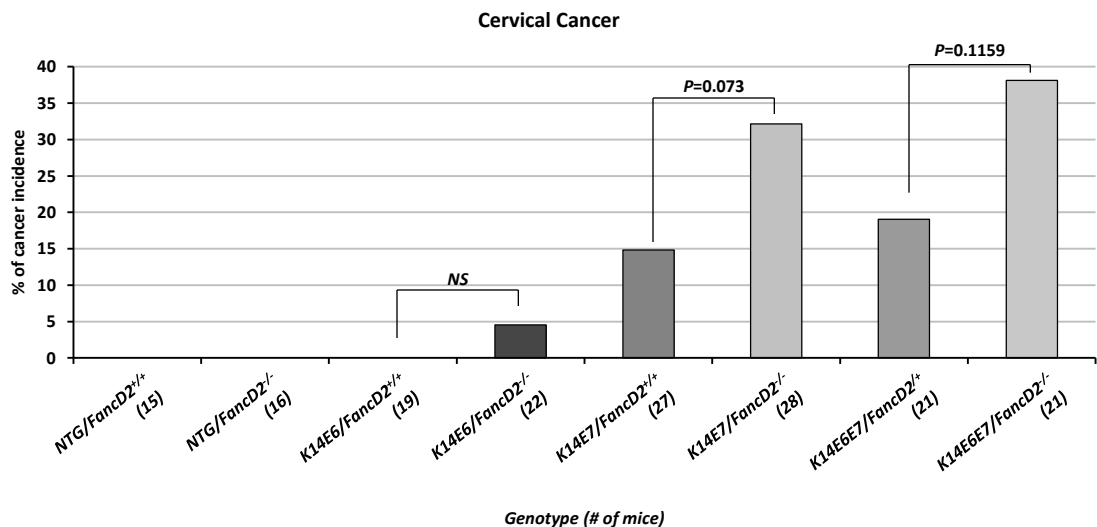

**NTG/FancD2<sup>+/+</sup> vs. K14E7/FancD2<sup>+/+</sup>; P=0.076**  
**NTG/FancD2<sup>+/+</sup> vs. K14E6E7/FancD2<sup>+/+</sup>; P=0.041**

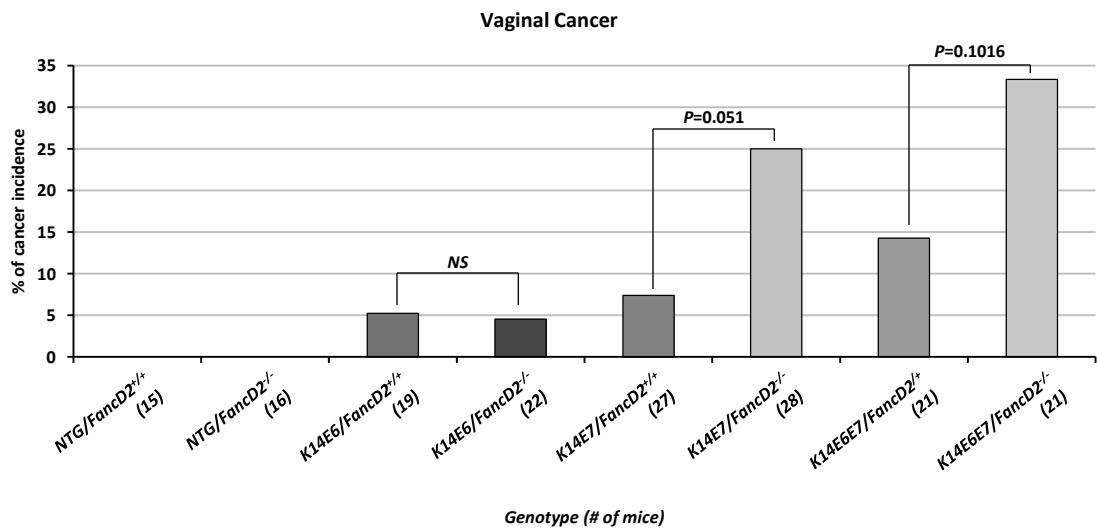

**NTG/FancD2<sup>+/+</sup> vs. K14E6/FancD2<sup>+/+</sup>; P=0.295**  
**NTG/FancD2<sup>+/+</sup> vs. K14E7/FancD2<sup>+/+</sup>; P=0.204**  
**NTG/FancD2<sup>+/+</sup> vs. K14E6E7/FancD2<sup>+/+</sup>; P=0.079**
