# Supplementary material
Source: PubMed Central journal article supplement (PMC3999289)
Supplement: NIHMS550221-supplement-3.pdf [file NIHMS550221-supplement-3.pdf]

## Supplementary figure 2

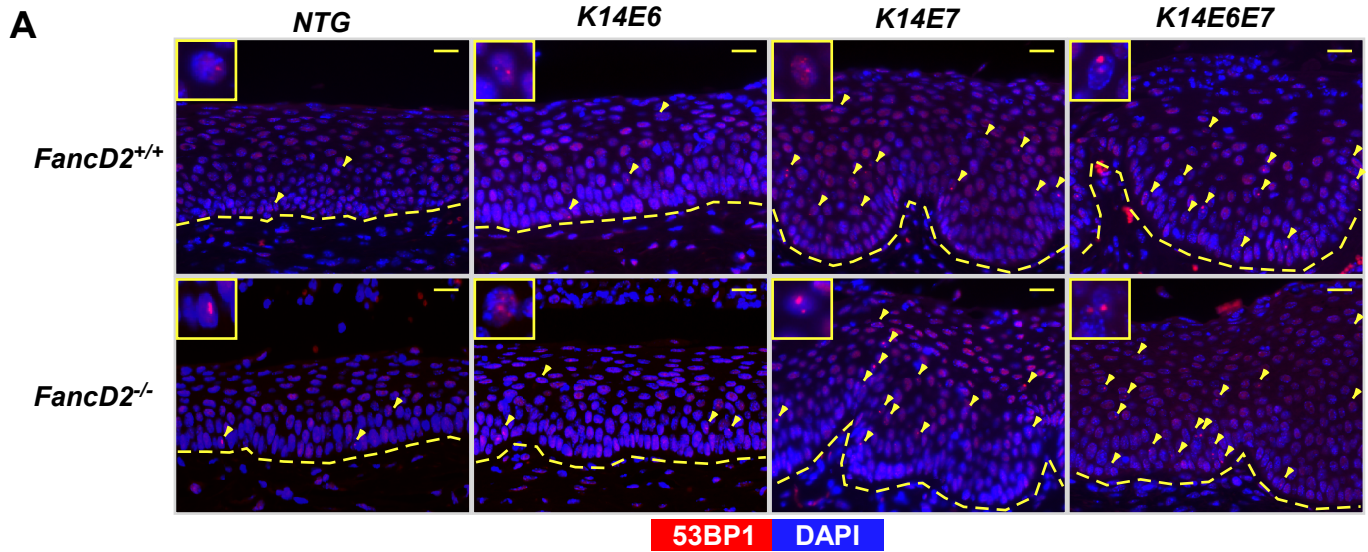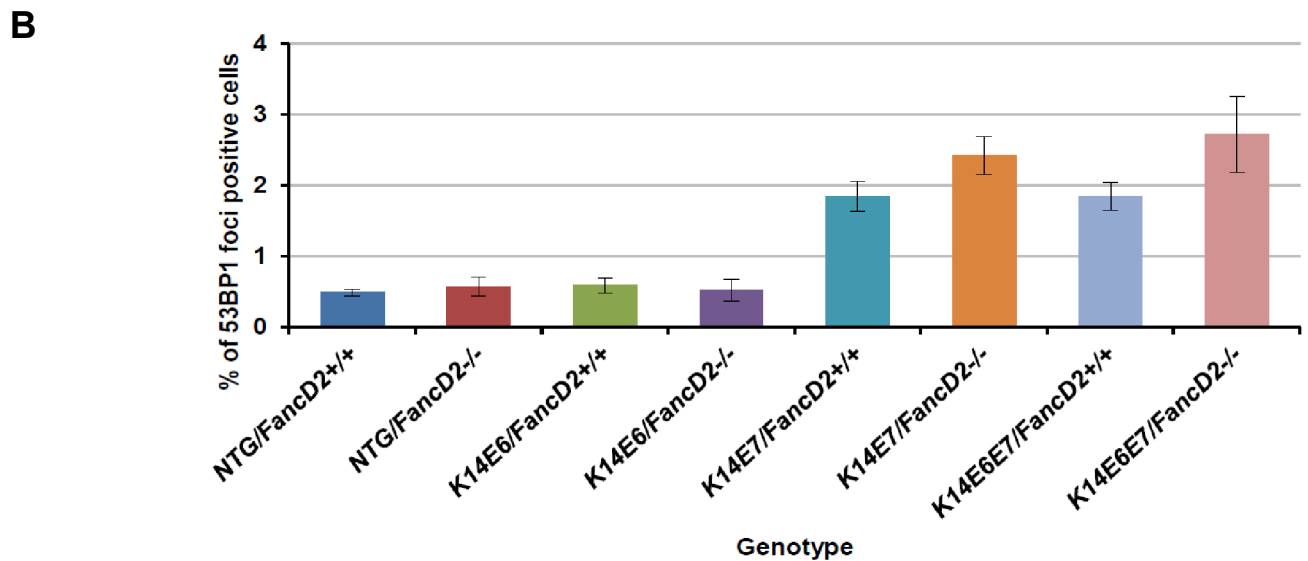

Supplementary figure 2. *FancD2* deficiency induced E7-dependent DNA damage response via 53BP1. A, to detect DNA damage response, tissue sections from each group were stained for anti-53BP1 (Red) antibody. DAPI (Blue) is used for a nuclear counterstaining. Scale bar, 20  $\mu$ m. 53BP1 nuclear-foci positive cells are highlighted by yellow arrows in the images. Insets provide magnified views of cells with 53BP1 positive nuclear-foci. The white dot line indicates basal membrane. B, at least three mice from NTG, K14E6, K14E7, and K14E6E7 mice in the presence and absence of *fancD2* expression were randomly selected and more than six image frames of cells at the epithelia of cervix were quantified for each mouse. The amount of 53BP1-foci positive cells over total number of cells was plotted in each case (columns); bar, Standard deviation (SD). In the epithelial layer of the cervical tissues, E7 expression and E6/E7 double expression significantly induced the number of 53BP1 nuclear-foci positive cells on *fancD2*-sufficient background (NTG/*FancD2* or K14E6/*FancD2*<sup>+/+</sup> vs. K14E7/*FancD2*<sup>+/+</sup> or K14E6E7/*FancD2*<sup>+/+</sup>;  $P < 0.05$ ). *fancD2* deficiency statistically increased proliferation in K14E7 and K14E6E7 mice (K14E7/*FancD2*<sup>+/+</sup> vs. K14E7/*FancD2*<sup>-/-</sup> and K14E6E7/*FancD2*<sup>+/+</sup> vs. K14E6E7/*FancD2*<sup>-/-</sup>;  $P < 0.05$ ), not in NTG and K14E6 mice. All statistical comparisons were performed using a two-sided Wilcoxon Rank sum test.
